# Supplementary material for: Serum IL-27 predicts the severity and prognosis in patients with community-acquired pneumonia: a prospective cohort study
Source: PubMed Central journal article supplement (PMC8692123; doi:10.7150/ijms.67028), 2022-01-01
Supplement: ijmsv19p0074s1.pdf [file ijmsv19p0074s1.pdf]

Table Supplemental 1. The associations of serum IL-27 with the prognosis in CAP patients with same severity

| CAP system | score | Total, N | Higher IL-27, N | ICU Admission, N (%) | Mechanical ventilation, N (%) | Vasoactive agent, N (%) | Death, N (%) | Hospital stays, N (%) |
|------------|-------|----------|-----------------|----------------------|-------------------------------|-------------------------|--------------|-----------------------|
| CURB-65    |       |          |                 |                      |                               |                         |              |                       |
| 0~1        |       | 148      | 64              | 4 (6.2)              | 4 (6.2)                       | 3 (4.7)                 | 2 (3.1)      | 12 (18.8)             |
| 2          |       | 50       | 35              | 13 (37.1)            | 13 (37.1)                     | 5 (14.3)                | 3 (8.6)      | 14 (40.0)             |
| 3~5        |       | 37       | 19              | 15 (78.9)            | 15 (78.9)                     | 12 (63.2)               | 8 (42.1)     | 13 (68.4)             |
| CRB-65     |       |          |                 |                      |                               |                         |              |                       |
| 0          |       | 84       | 71              | 1 (2.8)              | 1 (2.8)                       | 1 (2.8)                 | 1 (2.8)      | 4 (11.1)              |
| 1~2        |       | 126      | 118             | 21 (30.0)            | 22 (31.4)                     | 12 (17.1)               | 7 (10.0)     | 26 (41.1)             |
| ≥3         |       | 25       | 15              | 10 (83.3)            | 9 (75.0)                      | 7 (58.3)                | 5 (41.7)     | 9 (75.0)              |
| CURXO      |       |          |                 |                      |                               |                         |              |                       |
| Mild       |       | 62       | 86              | 9 (10.5)             | 10 (11.6)                     | 5 (5.8)                 | 2 (2.3)      | 19 (22.1)             |
| Severe     |       | 173      | 32              | 23 (71.9)            | 22 (68.8)                     | 15 (46.9)               | 11 (34.4)    | 17 (19.5)             |
| SMART-COP  |       |          |                 |                      |                               |                         |              |                       |
| 0~2        |       | 174      | 85              | 8 (9.4)              | 8 (9.4)                       | 3 (3.5)                 | 1 (1.2)      | 18 (21.2)             |
| 3~4        |       | 17       | 11              | 7 (63.6)             | 7 (63.6)                      | 3 (27.3)                | 3 (27.3)     | 4 (36.4)              |
| 5~6        |       | 30       | 15              | 11 (73.3)            | 11 (73.3)                     | 8 (53.3)                | 5 (33.3)     | 10 (66.7)             |
| 7~8        |       | 14       | 7               | 6 (85.7)             | 6 (85.7)                      | 6 (85.7)                | 4 (57.1)     | 7 (100.0)             |
| PSI        |       |          |                 |                      |                               |                         |              |                       |
| I          |       | 54       | 20              | 2 (10.0)             | 2 (10.0)                      | 1 (5.0)                 | 2 (10.0)     | 4 (20.0)              |
| II         |       | 61       | 30              | 1 (3.3)              | 1 (3.3)                       | 1 (3.3)                 | 0            | 7 (27.3)              |
| III        |       | 55       | 28              | 4 (14.3)             | 5 (17.9)                      | 2 (7.1)                 | 3 (10.7)     | 8 (28.6)              |
| IV         |       | 46       | 28              | 11 (39.3)            | 12 (42.9)                     | 6 (21.4)                | 2 (7.1)      | 10 (35.7)             |
